# Supplementary material for: Policy, Research and Residents’ Perspectives on Built Environments Implicated in Heart Disease: A Concept Mapping Approach
Source: PubMed Central journal article supplement (PMC5334724; doi:10.3390/ijerph14020170), 2017-02-09

# Supplementary Materials: Policy, Research and Residents’ Perspectives on Built Environments Implicated in Heart Disease: A Concept Mapping Approach

Ivana Stankov, Natasha J. Howard, Mark Daniel and Margaret Cargo

**Table S1.** Statements with accompanying bridging values, mean importance and changeability ratings and combined average importance and changeability ratings, by cluster.

| ID                                           | Statement                                                                                                                                                                          | BV                                                         | I    | C    | Avg I and C |
|----------------------------------------------|------------------------------------------------------------------------------------------------------------------------------------------------------------------------------------|------------------------------------------------------------|------|------|-------------|
| Cluster 1: Open Spaces                       |                                                                                                                                                                                    | Relative representation of statements in the go-zone (88%) |      |      |             |
| 82                                           | * Child-friendly environments to encourage families to use urban space                                                                                                             | 0.31                                                       | 4.24 | 3.82 | 4.03        |
| 19                                           | * The presence of trees providing shade and shelter in public spaces                                                                                                               | 0.28                                                       | 3.73 | 4.21 | 3.97        |
| 70                                           | * The presence of dog parks that are close by to walk to and meet people                                                                                                           | 0.36                                                       | 3.76 | 3.94 | 3.85        |
| 58                                           | * Public spaces that are ‘visible’ spaces; spaces such as parks which are visible from the street and by neighboring residents, promoting natural surveillance and improved safety | 0.36                                                       | 4.00 | 3.45 | 3.73        |
| 7                                            | The presence of leash-free dog walking facilities                                                                                                                                  | 0.37                                                       | 3.24 | 4.15 | 3.70        |
| 55                                           | * The amount of nice gardens, street trees and parks in the area for clean air, outdoor activities and exercise                                                                    | 0.30                                                       | 4.12 | 3.27 | 3.70        |
| 51                                           | * The visibility of open spaces, sporting grounds and other activity centers from major roads                                                                                      | 0.34                                                       | 4.00 | 3.3  | 3.65        |
| 78                                           | *Open space both public and private                                                                                                                                                | 0.31                                                       | 3.85 | 3.3  | 3.58        |
| Cluster 2: Quality of Pedestrian Environment |                                                                                                                                                                                    | Relative representation of statements in the go-zone (77%) |      |      |             |
| 16                                           | * The provision of useable bike paths or lanes for recreation                                                                                                                      | 0.44                                                       | 4.12 | 4.00 | 4.06        |
| 17                                           | * Trees and bushes planted strategically to cool and soften the physical environment                                                                                               | 0.28                                                       | 3.79 | 4.27 | 4.03        |
| 13                                           | * Adequate lighting to generate feelings of safety and management of vegetation/overgrowth to inhibit issues of concealment                                                        | 0.29                                                       | 3.82 | 4.09 | 3.96        |
| 96                                           | * Street lighting                                                                                                                                                                  | 0.29                                                       | 3.64 | 4.15 | 3.90        |
| 21                                           | * Quality footpaths that are set a reasonable distance from the road side, away from cars                                                                                          | 0.30                                                       | 4.00 | 3.76 | 3.88        |
| 69                                           | * Rundown or damaged public open space facilities                                                                                                                                  | 0.36                                                       | 3.67 | 3.97 | 3.82        |
| 80                                           | * Beach paths with way-finding signs and interesting art pieces                                                                                                                    | 0.32                                                       | 3.76 | 3.88 | 3.82        |
| 60                                           | * Quality open spaces connected to paths and other local destinations                                                                                                              | 0.31                                                       | 4.24 | 3.39 | 3.82        |
| 53                                           | *Tree-lined streets and footpaths on both sides of the street                                                                                                                      | 0.28                                                       | 3.88 | 3.73 | 3.81        |
| 101                                          | * A pleasant local area to walk in                                                                                                                                                 | 0.43                                                       | 3.82 | 3.48 | 3.65        |
| 79                                           | The presence of destinations to walk to, or local features to walk past from home or school                                                                                        | 0.39                                                       | 4.09 | 3.03 | 3.56        |
| 63                                           | Street level activity                                                                                                                                                              | 0.38                                                       | 3.27 | 2.94 | 3.11        |
| 65                                           | The presence of underground versus above-ground services (power, telephone, etc.) influencing how attractive the local environment is for exercise                                 | 0.33                                                       | 2.82 | 2.70 | 2.76        |

Table S1. Cont.

| Cluster 3: Public Transport and Traffic                |                                                                                                                                                                                     | Relative representation of statements in the go-zone (67%) |      |      |      |
|--------------------------------------------------------|-------------------------------------------------------------------------------------------------------------------------------------------------------------------------------------|------------------------------------------------------------|------|------|------|
| 37                                                     | * Accessible public transport to encourage mobility, reduce isolation and encourage walking                                                                                         | 0.34                                                       | 4.30 | 3.48 | 3.89 |
| 81                                                     | * Access to reliable public transport                                                                                                                                               | 0.36                                                       | 4.27 | 3.48 | 3.88 |
| 72                                                     | * Safe speed environments created by reducing and calming vehicles to facilitate safe pedestrian and cyclist movement along residential and collector streets                       | 0.29                                                       | 3.73 | 3.58 | 3.66 |
| 61                                                     | * Poor public transport connectivity across the region                                                                                                                              | 0.37                                                       | 3.67 | 3.27 | 3.47 |
| 57                                                     | Public transport access to walking beaches and Torrens Linear Park                                                                                                                  | 0.32                                                       | 3.52 | 3.39 | 3.46 |
| 42                                                     | Traffic calming measures                                                                                                                                                            | 0.30                                                       | 3.42 | 3.42 | 3.42 |
| Cluster 4: Street Connectivity                         |                                                                                                                                                                                     | Relative representation of statements in the go-zone (43%) |      |      |      |
| 89                                                     | * Continuous and safe bike corridors (i.e., bike lanes do not disappear into traffic)                                                                                               | 0.32                                                       | 4.30 | 3.82 | 4.06 |
| 92                                                     | * Clear, safe and separated bike paths leading to the city and local schools                                                                                                        | 0.32                                                       | 4.09 | 3.85 | 3.97 |
| 59                                                     | The walkability of the local area                                                                                                                                                   | 0.35                                                       | 4.21 | 3.24 | 3.73 |
| 75                                                     | * Pathways and connecting links between cul-de-sacs                                                                                                                                 | 0.31                                                       | 3.82 | 3.30 | 3.56 |
| 47                                                     | The presence of walking paths that have under/over passes over main arterial roads (i.e., to encourage safe walking)                                                                | 0.33                                                       | 3.88 | 3.06 | 3.47 |
| 26                                                     | Commercial destinations within walking or cycling distance from homes                                                                                                               | 0.37                                                       | 3.82 | 2.79 | 3.31 |
| 27                                                     | High street connectivity (grid-type street pattern)                                                                                                                                 | 0.37                                                       | 3.82 | 2.67 | 3.25 |
| Cluster 5: Community Social Infrastructure             |                                                                                                                                                                                     | Relative representation of statements in the go-zone (43%) |      |      |      |
| 29                                                     | * Outdoor areas with organized programs to encourage interaction and exercise with others                                                                                           | 0.41                                                       | 3.73 | 3.70 | 3.72 |
| 30                                                     | * The provision of social neighborhood hubs and meeting places such as corner stores, cafes and libraries                                                                           | 0.42                                                       | 3.70 | 3.67 | 3.69 |
| 88                                                     | Community centers where there are activities to participate in                                                                                                                      | 0.52                                                       | 3.58 | 3.73 | 3.66 |
| 45                                                     | * A high number of community centers in the region, with emphasis on exercise for elderly programs                                                                                  | 0.41                                                       | 3.61 | 3.61 | 3.61 |
| 23                                                     | Places to gather or meet friends                                                                                                                                                    | 0.45                                                       | 3.52 | 3.52 | 3.52 |
| 91                                                     | The presence of community and public artwork to document history and culture and create colorful textures and images                                                                | 0.37                                                       | 2.88 | 3.91 | 3.40 |
| 28                                                     | The presence of gardens which mean that people get out and exercise while weeding, watering and maintaining the garden                                                              | 0.48                                                       | 3.61 | 2.76 | 3.19 |
| Cluster 6: Physical Activity and Recreation Facilities |                                                                                                                                                                                     | Relative representation of statements in the go-zone (38%) |      |      |      |
| 50                                                     | * The availability of public open space with supportive facilities (e.g., toilets, water fountains, pathways, BBQ area, picnic tables, rubbish bins, car parking adjacent to parks) | 0.33                                                       | 4.45 | 4.03 | 4.24 |
| 25                                                     | * The availability of playground equipment for children                                                                                                                             | 0.31                                                       | 4.03 | 4.24 | 4.14 |
| 41                                                     | * Access to well-maintained parks and playgrounds (i.e., that feel safe for parents to bring children) with facilities for a range of ages                                          | 0.33                                                       | 4.21 | 4.00 | 4.11 |
| 38                                                     | * Community access to school sports grounds and facilities                                                                                                                          | 0.31                                                       | 4.09 | 4.03 | 4.06 |
| 83                                                     | * Access to local, well-lit ovals (i.e., for evening sporting activities)                                                                                                           | 0.31                                                       | 3.94 | 3.79 | 3.87 |
| 10                                                     | Well promoted "come and try" days at local sports venues, especially encouraging adults to play sports                                                                              | 0.42                                                       | 3.24 | 4.09 | 3.67 |
| 34                                                     | Council-provided playgrounds and activities, designed by "risk averse" culture, that are boring for kids and therefore used rarely                                                  | 0.38                                                       | 3.42 | 3.91 | 3.67 |
| 5                                                      | The presence of a central hub with facilities for a variety of sporting activities and wellbeing                                                                                    | 0.32                                                       | 3.55 | 3.39 | 3.47 |
| 44                                                     | The presence of outdoor gyms                                                                                                                                                        | 0.31                                                       | 3.27 | 3.55 | 3.41 |

Table S1. Cont.

|                                               |                                                                                                                                                 |                                                            |      |      |      |      |      |
|-----------------------------------------------|-------------------------------------------------------------------------------------------------------------------------------------------------|------------------------------------------------------------|------|------|------|------|------|
| 77                                            | Access to safe, inclusive and affordable local sports clubs                                                                                     | 0.36                                                       | 3.73 | 3.09 | 3.41 |      |      |
| 40                                            | The availability of local swimming pools                                                                                                        | 0.3                                                        | 3.67 | 3.03 | 3.35 |      |      |
| 8                                             | Access to gyms                                                                                                                                  | 0.34                                                       | 3.27 | 2.91 | 3.09 |      |      |
| 18                                            | The availability of local gyms                                                                                                                  | 0.32                                                       | 3.09 | 2.97 | 3.03 |      |      |
| Cluster 7: Food Environment                   |                                                                                                                                                 | Relative representation of statements in the go-zone (29%) |      | 0.24 | 3.60 | 3.06 | 3.33 |
| 20                                            | * The provision and access to healthy food                                                                                                      | 0.17                                                       | 4.30 | 3.58 | 3.94 |      |      |
| 31                                            | * Access to, and affordability of, fresh produce                                                                                                | 0.03                                                       | 4.42 | 3.45 | 3.94 |      |      |
| 54                                            | * Communal places to grow fresh foods, including school vegetable gardens, shared orchards, verge planting and small scale urban food producers | 0.69                                                       | 3.91 | 3.79 | 3.85 |      |      |
| 3                                             | The saturation of unhealthy food outlets                                                                                                        | 0.01                                                       | 4.33 | 3.15 | 3.74 |      |      |
| 6                                             | The build-up of fast food outlets, on popular routes and near low income housing                                                                | 0.00                                                       | 4.27 | 3.00 | 3.64 |      |      |
| 12                                            | * The amount of junk food advertising                                                                                                           | 0.12                                                       | 3.85 | 3.39 | 3.62 |      |      |
| 64                                            | Farmers Markets which enable local produce to be sold for healthy eating                                                                        | 0.14                                                       | 3.55 | 3.58 | 3.57 |      |      |
| 93                                            | Accessibility of fast food outlets                                                                                                              | 0.02                                                       | 3.73 | 2.52 | 3.13 |      |      |
| 74                                            | Recycled organic waste which benefits soil fertility                                                                                            | 0.64                                                       | 2.55 | 3.42 | 2.99 |      |      |
| 22                                            | The attractiveness of local supermarkets                                                                                                        | 0.63                                                       | 2.85 | 3.03 | 2.94 |      |      |
| 24                                            | The number of pubs/clubs in the local area (i.e., access to alcohol)                                                                            | 0.66                                                       | 2.94 | 2.85 | 2.90 |      |      |
| 52                                            | The ease of buying or having junk food delivered to your door                                                                                   | 0.02                                                       | 3.45 | 2.27 | 2.86 |      |      |
| 98                                            | The presence of backyard vegetable gardens for food                                                                                             | 0.15                                                       | 3.36 | 2.30 | 2.83 |      |      |
| 15                                            | A large selection of Asian restaurants and shops which offer an alternate healthy option over general western diet                              | 0.11                                                       | 2.82 | 2.58 | 2.70 |      |      |
| Cluster 8: Service and Technology Environment |                                                                                                                                                 | Relative representation of statements in the go-zone (11%) |      | 0.81 | 3.31 | 3.41 | 3.36 |
| 11                                            | Access to schools for education on healthy lifestyles                                                                                           | 0.69                                                       | 3.55 | 4.18 | 3.87 |      |      |
| 100                                           | * Access to health services                                                                                                                     | 0.74                                                       | 3.64 | 3.58 | 3.61 |      |      |
| 33                                            | A workplace providing health promotion programs                                                                                                 | 0.82                                                       | 3.55 | 3.67 | 3.61 |      |      |
| 4                                             | Education opportunities                                                                                                                         | 0.74                                                       | 3.21 | 3.67 | 3.44 |      |      |
| 95                                            | The location of smoking areas outside of buildings                                                                                              | 0.73                                                       | 3.09 | 3.76 | 3.43 |      |      |
| 48                                            | Appropriateness of health services                                                                                                              | 0.77                                                       | 3.45 | 3.33 | 3.39 |      |      |
| 66                                            | Access to new technologies in order to enable information seeking                                                                               | 0.89                                                       | 2.97 | 3.30 | 3.14 |      |      |
| 49                                            | Employment opportunities                                                                                                                        | 0.92                                                       | 3.39 | 2.55 | 2.97 |      |      |
| 9                                             | The increased use of online technology and virtual service providers that meet people's needs without having to leave the home                  | 1.00                                                       | 2.91 | 2.67 | 2.79 |      |      |
| Cluster 9: Land Use Mix                       |                                                                                                                                                 | Relative representation of statements in the go-zone (0%)  |      | 0.49 | 3.36 | 2.91 | 3.14 |
| 68                                            | The identification and transformation of underutilized land and public spaces, particularly along the railway line                              | 0.41                                                       | 3.3  | 3.58 | 3.44 |      |      |
| 2                                             | Low dwelling density, poor land use mix (i.e., nothing to walk too) and concentrated retail opportunity                                         | 0.49                                                       | 3.91 | 2.85 | 3.38 |      |      |

**Table S1.** *Cont.*

|                                         |                                                                                                                                                                                                                                                                              |                                                           |      |      |      |      |      |
|-----------------------------------------|------------------------------------------------------------------------------------------------------------------------------------------------------------------------------------------------------------------------------------------------------------------------------|-----------------------------------------------------------|------|------|------|------|------|
| 90                                      | The integration of new developments and older/historical dwellings to reduce feelings of isolation and separation, promote daily mobility, create sense of vibrancy and dynamic change                                                                                       | 0.47                                                      | 3.39 | 3.30 | 3.35 |      |      |
| 36                                      | Medium density housing, located in activity centers, with plenty of amenities                                                                                                                                                                                                | 0.44                                                      | 3.48 | 3.03 | 3.26 |      |      |
| 71                                      | The quality of the air                                                                                                                                                                                                                                                       | 0.56                                                      | 3.85 | 2.61 | 3.23 |      |      |
| 76                                      | The centralization of core services (i.e., butchers, bakeries and deli's) into large shopping centers, rather than smaller district or local service areas/centers which encourage people to drive to do weekly shop rather than walking to do small/frequent shopping trips | 0.62                                                      | 3.76 | 2.45 | 3.11 |      |      |
| 35                                      | Graffiti                                                                                                                                                                                                                                                                     | 0.61                                                      | 2.52 | 3.52 | 3.02 |      |      |
| 85                                      | Built environments that reflect dignity, culture and self-determination                                                                                                                                                                                                      | 0.45                                                      | 3.21 | 2.79 | 3.00 |      |      |
| 14                                      | Single building allotments, leading to isolation within the neighborhood as people become more fearful and less likely to go outside as they age                                                                                                                             | 0.46                                                      | 3.03 | 2.67 | 2.85 |      |      |
| 67                                      | Fewer industries in suburban areas                                                                                                                                                                                                                                           | 0.42                                                      | 3.18 | 2.33 | 2.76 |      |      |
| Cluster 10: Housing Design and Planning |                                                                                                                                                                                                                                                                              | Relative representation of statements in the go-zone (0%) |      | 0.59 | 3.31 | 2.66 | 2.99 |
| 32                                      | Public housing in poor condition                                                                                                                                                                                                                                             | 0.54                                                      | 3.27 | 3.36 | 3.32 |      |      |
| 73                                      | Poorly designed neighborhoods with housing features that reduce community interactivity                                                                                                                                                                                      | 0.62                                                      | 3.76 | 2.67 | 3.22 |      |      |
| 94                                      | The density of public housing within the local area (which could influence economic status, social cohesion, crime, safety, etc.)                                                                                                                                            | 0.50                                                      | 3.52 | 2.88 | 3.20 |      |      |
| 97                                      | The size of housing and allotments influencing the green space available in backyards for exercise (e.g., gardening and backyard cricket)                                                                                                                                    | 0.56                                                      | 3.55 | 2.70 | 3.13 |      |      |
| 102                                     | High house prices and general living costs force people to work too much which prevents people (younger generations in particular) from having an active and healthy lifestyle                                                                                               | 0.70                                                      | 3.55 | 2.36 | 2.96 |      |      |
| 56                                      | Type of access in multi-level buildings (i.e., option to take the stairs rather than the lift)                                                                                                                                                                               | 0.65                                                      | 3.09 | 2.61 | 2.85 |      |      |
| 62                                      | Housing tenure                                                                                                                                                                                                                                                               | 0.62                                                      | 2.85 | 2.39 | 2.62 |      |      |
| 84                                      | Housing style                                                                                                                                                                                                                                                                | 0.55                                                      | 2.91 | 2.30 | 2.61 |      |      |
| Cluster 11: Car-centric Environment     |                                                                                                                                                                                                                                                                              | Relative representation of statements in the go-zone (0%) |      | 0.42 | 3.39 | 2.37 | 2.88 |
| 99                                      | The nature of new residential developments, with emphasis on non-linear roads (and huge number of cul-de-sac suburbs) resulting in the need for car transport for basic shopping trips                                                                                       | 0.42                                                      | 3.85 | 3.24 | 3.55 |      |      |
| 87                                      | Car and industry centric environments                                                                                                                                                                                                                                        | 0.42                                                      | 3.42 | 2.42 | 2.92 |      |      |
| 39                                      | The volume of motor vehicles on the road                                                                                                                                                                                                                                     | 0.36                                                      | 3.30 | 2.33 | 2.82 |      |      |
| 1                                       | Industries estates too far (or too inconveniently) from residential areas, making it difficult for workers to travel in ways other than by car                                                                                                                               | 0.45                                                      | 3.27 | 2.30 | 2.79 |      |      |
| 86                                      | The placement of shopping center car parks at the back or underground which improves ease of access to pedestrians                                                                                                                                                           | 0.48                                                      | 3.18 | 2.39 | 2.79 |      |      |
| 46                                      | The distance needed to travel to work                                                                                                                                                                                                                                        | 0.47                                                      | 3.52 | 1.79 | 2.66 |      |      |
| 43                                      | Major roads through suburbs                                                                                                                                                                                                                                                  | 0.35                                                      | 3.18 | 2.09 | 2.64 |      |      |

BV = bridging value; I = importance rating; C = changeability rating; Avg I and C = combined average importance and changeability ratings; \* = statements in the go-zone.

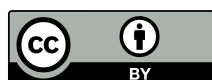

Supplement: ijerph-14-00170-s001.pdf [file ijerph-14-00170-s001.pdf]
